# Supplementary material for: Facile determination of formal transfer potentials for hydrophilic alkali metal ions at water|ionic liquid microinterfaces
Source: Royal Society of Chemistry journal article supplement (doi:10.1039/c2cp42107k), 2012-01-01
Supplement: c2cp42107k.pdf [file c2cp42107k.pdf]

# Electronic Supplementary Information for: Facile determination of formal transfer potentials for hydrophilic alkali metal ions at water|ionic liquid microinterfaces

Tom J. Stockmann and Zhifeng Ding<sup>†</sup>

Department of Chemistry, The University of Western Ontario, 1151 Richmond Street, London,  
Ontario, Canada, N6A 5B7

<sup>†</sup>To whom correspondence should be addressed. Tel: +1 519 661-2111 ext 86161; Fax: +1 519  
661-3022; Email: zfding@uwo.ca

URL: <http://publish.uwo.ca/~zfding/>

## Table of Contents

1. Theory
2. Comsol Model Report

### 1. Theory

What follows is a brief restatement of the theory from the main paper as it relates to Comsol Model report which follows. Please note that this is not intended as a rigorous treatment but intended for those who wish to utilize/reproduce/replicate the simulation.

Simple ion transfer (IT) as detailed in equation 1, below, was simulated at a micro-ITIES housed at the tip of a micropipette.

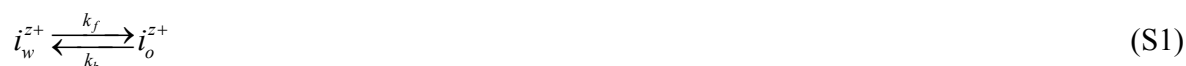

where ion  $i$  with charge  $z+$  transfers from aqueous to RTIL. Two ‘Diffusion’ multiphysics were employed to represent the concentration of  $i$  in either phase or subdomain; they were turned off with in their opposing phase. Please note that the micropipette geometry is included in the Comsol Model report which follows and in Figure 1. Diffusion within each phase was performed using Fick’s laws of diffusion and equation 2:

$$\frac{\partial c_\alpha^i(r, z, t)}{\partial t} = D_\alpha^i \left( \frac{\partial^2 c_\alpha^i(r, z, t)}{\partial r^2} + \frac{1}{r} \frac{\partial c_\alpha^i(r, z, t)}{\partial r} + \frac{\partial^2 c_\alpha^i(r, z, t)}{\partial z^2} \right) = D_\alpha^i \nabla c_\alpha^i(r, z, t) = 0 \quad (\text{S2})$$

such that  $c_{\alpha}^i$  and  $D_{\alpha}^i$  are the concentration and diffusion coefficient of species  $i$  in phase  $\alpha$ ;  $\nabla$ , or del, is the gradient or vector operator – shown here in cylindrical coordinates. In the simulation code, the constants  $C_{aq}$  and  $C_{org}$  were used to define the initial (or bulk) concentrations in the aqueous and RTIL phases with values of 5 and 0 mol·m<sup>-3</sup> (or mM), respectively. Similarly, the diffusion coefficients were defined using the constants  $D_{aq}$  and  $D_{org}$  with initial values of  $2.0 \times 10^{-9}$  and  $0.5 \times 10^{-13}$  m<sup>2</sup>·s<sup>-1</sup> for the water and RTIL phases respectively. The forward and reverse rate constants  $k_f$  and  $k_b$ , respectively, were treated using Butler-Volmer kinetics through equations 3 and 4 below:

$$k_f = k^o \exp\left(-\alpha f(\Delta_{RTIL}^w \phi - \Delta_{RTIL}^w \phi^{o'})\right) \quad (S4)$$

$$k_b = k^o \exp\left((1-\alpha)f(\Delta_{RTIL}^w \phi - \Delta_{RTIL}^w \phi^{o'})\right) \quad (S5)$$

here,  $k^o$  is the standard rate constant,  $\alpha$  is the transfer coefficient,  $\Delta_o^w \phi$  is the applied Galvani potential difference across the interface,  $\Delta_o^w \phi^{o'}$  is the formal transfer potential, and  $f = z_i F / RT$ ;  $z_i$  is the charge of species  $i$ ,  $F$  is Faraday's constant (96485.33 C·mol<sup>-1</sup>),  $R$  is the gas constant (8.314 kJ·mol<sup>-1</sup>·K<sup>-1</sup>), and  $T$  is temperature in Kelvin (333.15 K). In the simulation the constants designations for  $F$ ,  $R$ , and  $T$  remained the same, however,  $k^o$ ,  $\alpha$ , and  $z_i$  were called  $k0$ ,  $\alpha$ , and  $n1$  with values of  $5 \times 10^{-6}$  m·s<sup>-1</sup>, 0.5, and 1+, respectively. Equations 4 and 5 were included in the boundary conditions for the ITIES under 'Mass Transfer Coefficient'.

In order to fulfill the BV kinetic theory the concentration must be known at the interface, of for  $c_{\alpha}^i(r, 0, t)$ . This was performed through a simple Nernst relationship denoted in the user defined equations as `nernst1`:

$$\frac{c_{RTIL}^i}{c_w^i} = \exp\left(\Delta_{RTIL}^w \phi - \Delta_{RTIL}^w \phi_{i^{z_i}}^{o'}\right)$$

This was implemented within the interfacial boundary condition for boundary 5,  $c_b$ .

A special note concerning the formal transfer potential, variable `E0`, used in the simulation: a value of 0.100 V was entered, however, the CV generated possessed a calculated formal transfer potential of 0.252 V. Interestingly, when the diffusion coefficient, `Dorg`, is increased, the resultant half-wave potential shifts towards that of the input value: 0.100 V. With regards to the working curve utilized in the simulation, this should not be an issue since both axis were normalized, however, we are currently investigating whether this is an artifact of the simulation or a legitimate, liquid|liquid phenomenon.

Moving forward, the applied potential was a triangular wave function which can be found in the 'Scalar Expressions' and was input as a variable into equations 4 and 5.

$$\Delta_{RTL}^w \phi = \Delta_{RTL}^w \phi_i + \frac{2(\Delta_{RTL}^w \phi_f - \Delta_{RTL}^w \phi_i)}{\pi} \sinh \left\{ \sin \left( \frac{\pi \nu t}{2(\Delta_{RTL}^w \phi_f - \Delta_{RTL}^w \phi_i)} \right) \right\} \quad (\text{S6})$$

Where  $\Delta_{RTL}^w \phi_i$ ,  $\Delta_{RTL}^w \phi_f$ ,  $\nu$ , and  $t$  are the initial potential, final potential, scan rate (in  $\text{V}\cdot\text{s}^{-1}$ ), and time or  $E_i$ ,  $E_f$ ,  $\nu$ , and  $t$  in the simulation, respectively. In this way, the potential difference was applied at the interface.

The current was integrated at the interface through a ‘Integration Coupling Variable’ and the following expression:

$$I = 2\pi z_i F \int (-D_\alpha^i \nabla c_\alpha^i(r, z, t)) r dr \quad (6)$$

Please note that, in Comsol,  $\int (-D_\alpha^i \nabla c_\alpha^i) r dr$ , is represented simply as `ndflux_c1_di`.

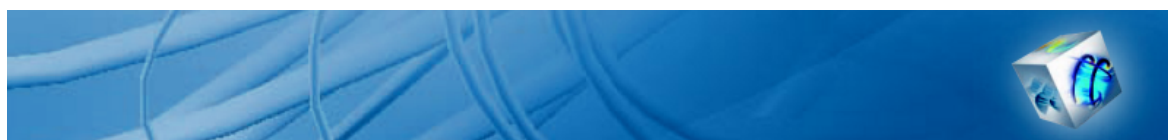

## 2. COMSOL Model Report

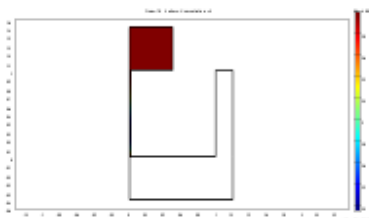

### 1. Table of Contents

- Title - COMSOL Model Report
- Table of Contents
- Model Properties
- Constants
- Geometry
- Geom1
- Materials/Coefficients Library
- Integration Coupling Variables
- Solver Settings
- Postprocessing

- Variables

## 2. Model Properties

| Property       | Value                    |
|----------------|--------------------------|
| Model name     |                          |
| Author         |                          |
| Company        |                          |
| Department     |                          |
| Reference      |                          |
| URL            |                          |
| Saved date     | Jun 21, 2012 12:01:12 PM |
| Creation date  | Jun 30, 2005 8:09:00 PM  |
| COMSOL version | COMSOL 3.5.0.603         |

File name: D:\LL\_EC1\_UO2\Cmsol35\micro-ITIES\2012\011912\_wRTIL\_IT\2012\_0621\_formatted.mph

Application modes and modules used in this model:

- Geom1 (Axial symmetry (2D))
  - Diffusion (Chemical Engineering Module)
  - Diffusion (Chemical Engineering Module)

## 3. Constants

| Name | Expression | Value    | Description                                |
|------|------------|----------|--------------------------------------------|
| R    | 8.314      | 8.314    | gas constant                               |
| T    | 333.15     | 333.15   | temperature in Kelvin                      |
| F    | 96485.33   | 96485.33 | Faraday's constant                         |
| fara | $F/(R*T)$  | 34.83465 |                                            |
| nu   | 0.02       | 0.02     | scan rate                                  |
| Ei   | 0          | 0        | initial potential                          |
| Ef   | 0.7        | 0.7      | final potential                            |
| Daq  | 2e-9       | 2e-9     | diffusion coefficient in the aqueous phase |
| Dorg | 0.5e-13    | 5e-14    | diffusion coefficient in the RTIL phase    |
| Caq  | 5          | 5        | $[i](aq)$                                  |
| Corg | 0          | 0        | $[i](RTIL)$                                |
| n1   | 1          | 1        | charge of ion i                            |
| E0   | 0.1        | 0.1      | formal transfer potential                  |

|       |      |      |                        |
|-------|------|------|------------------------|
| alpha | 0.5  | 0.5  | transfer coefficient   |
| k0    | 5e-6 | 5e-6 | standard rate constant |

## 4. Geometry

Number of geometries: 1

### 4.1. Geom1

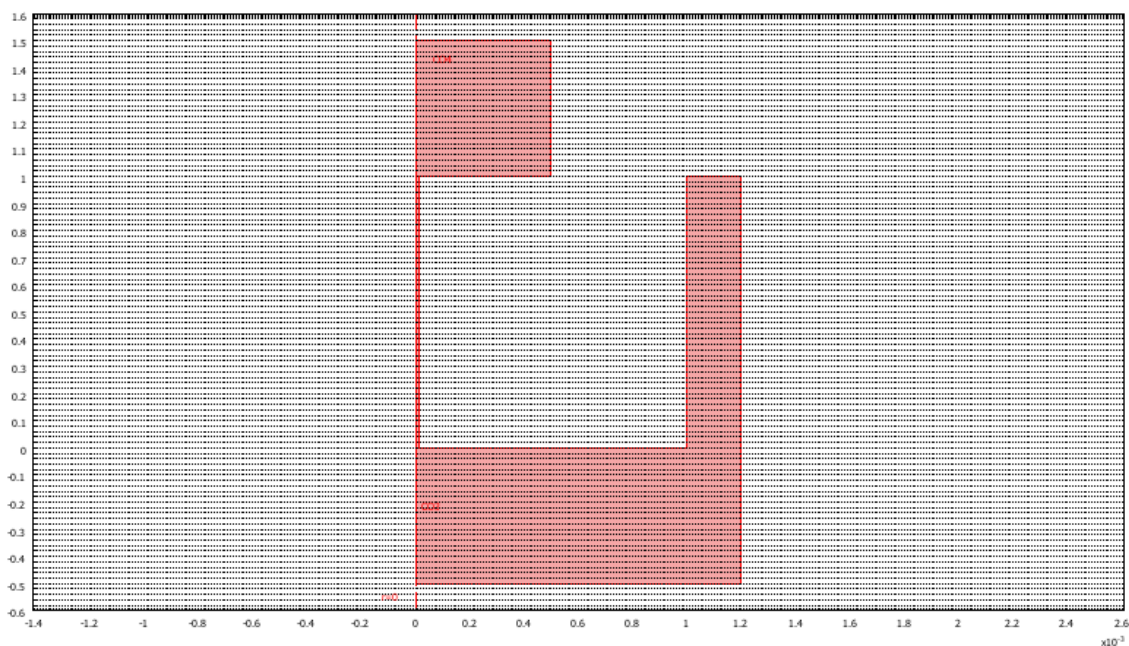

#### 4.1.1. Point mode

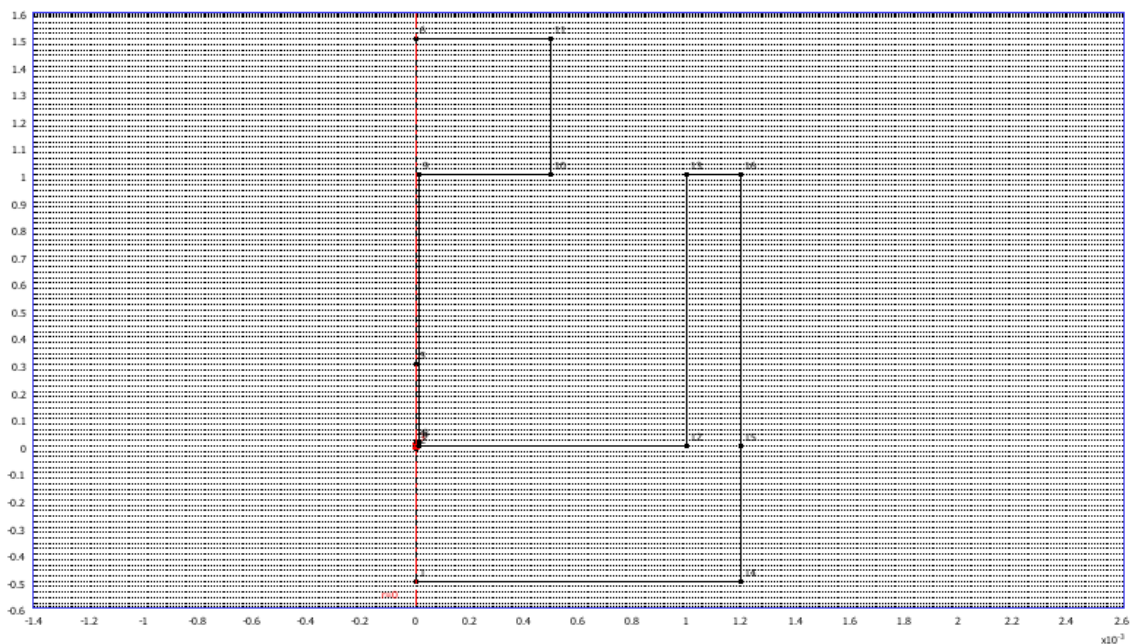

#### 4.1.2. Boundary mode

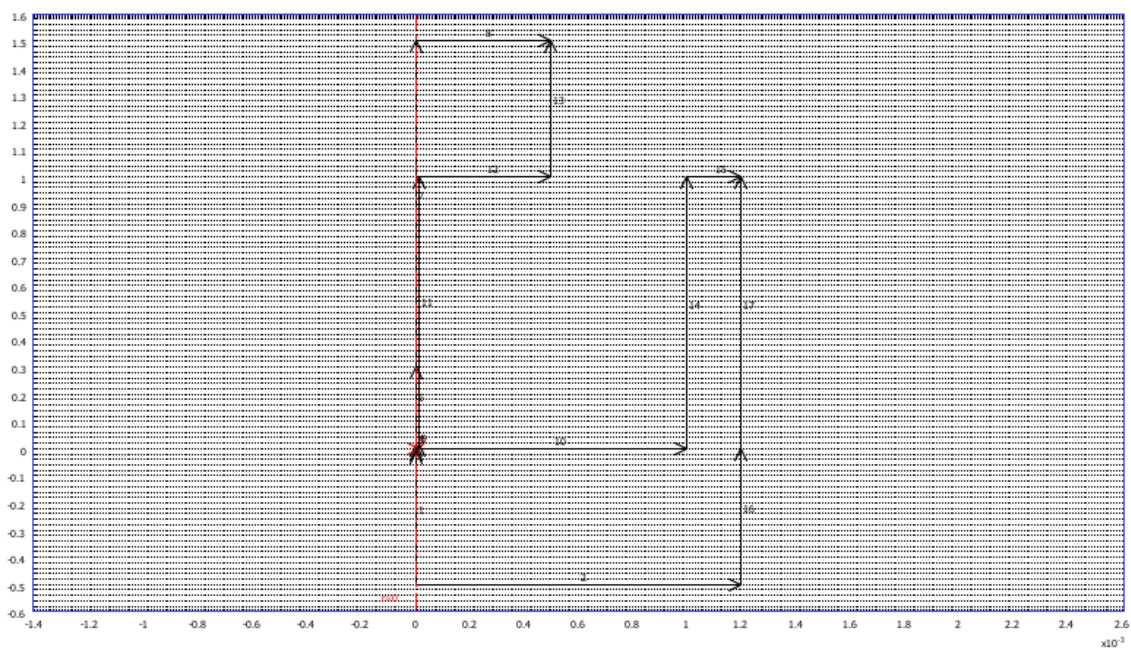

#### 4.1.3. Subdomain mode

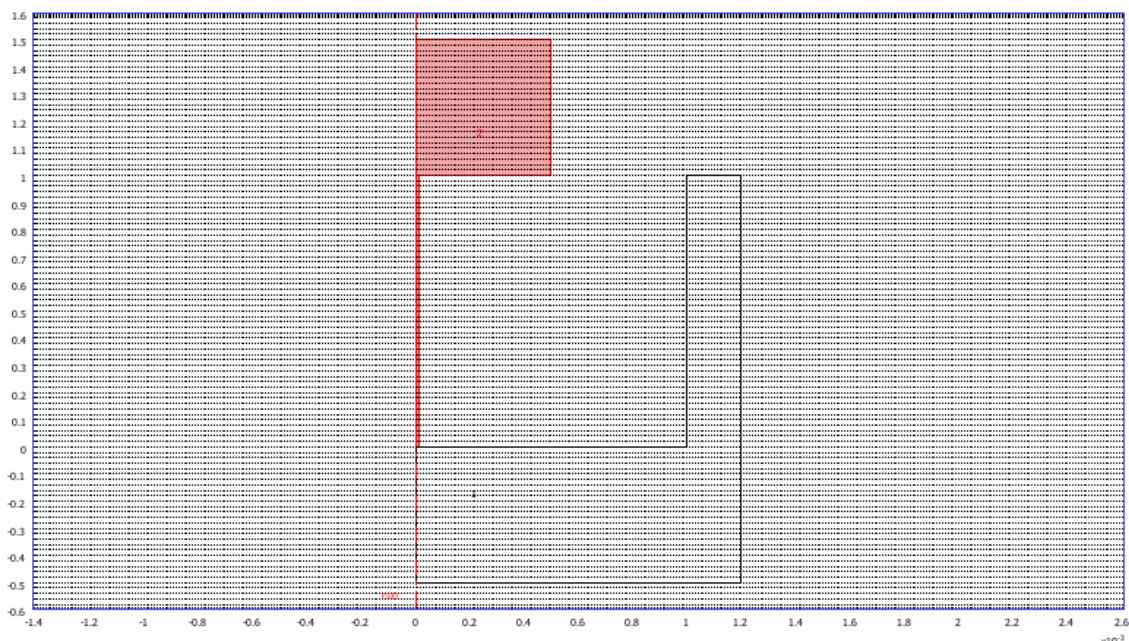

## 5. Geom1

Space dimensions: Axial symmetry (2D)

Independent variables: r, phi, z

### 5.1. Scalar Expressions

| Name       | Expression                                                                               | Description           |
|------------|------------------------------------------------------------------------------------------|-----------------------|
| E_swp      | $E_i + 2 * ((E_f - E_i) / \pi) * \text{asin}(\sin((\pi * \nu * t) / (2 * (E_f - E_i))))$ | triangular wave form  |
| kf1        | $k_0 * \exp(-1 * \alpha * (n_1 * \text{fara} * (E\_swp - E_0)))$                         | forward rate equation |
| kb1        | $k_0 * \exp((1 - \alpha) * (n_1 * \text{fara} * (E\_swp - E_0)))$                        | reverse rate equation |
| nernst1    | $\exp(n_1 * \text{fara} * (E\_swp - E_0))$                                               |                       |
| E_swp_void | $(E_i + \nu * t) * (t \leq 25) + (E_f - 1 * \nu * (t - 25)) * (t > 25) * 0$              |                       |

### 5.2. Mesh

#### 5.2.1. Mesh Statistics

|                              |       |
|------------------------------|-------|
| Number of degrees of freedom | 13617 |
| Number of mesh points        | 3545  |
| Number of elements           | 6328  |
| Triangular                   | 6328  |

|                             |      |
|-----------------------------|------|
| Quadrilateral               | 0    |
| Number of boundary elements | 822  |
| Number of vertex elements   | 16   |
| Minimum element quality     | 0.76 |
| Element area ratio          | 0    |

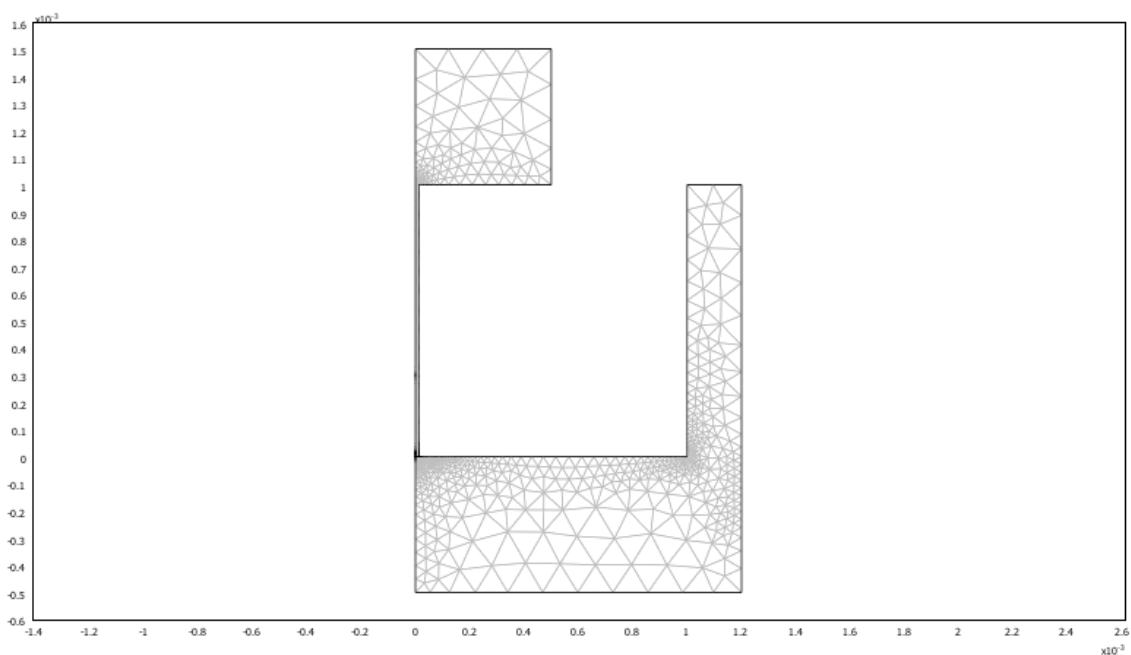

### 5.3. Application Mode: Diffusion (di2)

Application mode type: Diffusion (Chemical Engineering Module)

Application mode name: di2

#### 5.3.1. Application Mode Properties

| Property               | Value                |
|------------------------|----------------------|
| Default element type   | Lagrange - Quadratic |
| Analysis type          | Transient            |
| Equilibrium assumption | Off                  |
| Frame                  | Frame (rz)           |
| Weak constraints       | Off                  |
| Constraint type        | Ideal                |

#### 5.3.2. Variables



Dependent variables: c2

Shape functions: shlag(2,'c2')

Interior boundaries not active

### 5.3.3. Boundary Settings

|                                |                |                   |                     |
|--------------------------------|----------------|-------------------|---------------------|
| Boundary                       | 4, 6-8, 13     | 5                 | 9, 11-12            |
| Type                           | Axial symmetry | Flux              | Insulation/Symmetry |
| Mass transfer coefficient (kc) | 0              | <b>kb1</b>        | 0                   |
| Bulk concentration (cb)        | 0              | <b>c1/nernst1</b> | 0                   |
| Concentration (c0)             | 0              | <b>c1/nernst</b>  | 0                   |

### 5.3.4. Subdomain Settings

|                             |                      |
|-----------------------------|----------------------|
| Subdomain                   | 2                    |
| Shape functions (shape)     | <b>shlag(2,'c2')</b> |
| Integration order (gporder) | <b>4</b>             |
| Constraint order (cporder)  | <b>2</b>             |
| Diffusion coefficient (D)   | <b>Daq</b>           |
| Subdomain initial value     | 2                    |
| Concentration, c2 (c2)      | Caq                  |

## 5.4. Application Mode: Diffusion (di)

Application mode type: Diffusion (Chemical Engineering Module)

Application mode name: di

### 5.4.1. Application Mode Properties

| Property               | Value                |
|------------------------|----------------------|
| Default element type   | Lagrange - Quadratic |
| Analysis type          | Transient            |
| Equilibrium assumption | Off                  |
| Frame                  | Frame (rz)           |
| Weak constraints       | On                   |
| Constraint type        | Ideal                |

### 5.4.2. Variables

Dependent variables: c1

Shape functions: shlag(2,'lm1'), shlag(2,'c1')

Interior boundaries not active

### 5.4.3. Boundary Settings

|                                |                     |               |                   |
|--------------------------------|---------------------|---------------|-------------------|
| Boundary                       | 1, 3                | 2, 15-17      | 5                 |
| Type                           | Axial symmetry      | Concentration | Flux              |
| Mass transfer coefficient (kc) | 0                   | 0             | <b>kf1</b>        |
| Bulk concentration (cb)        | 0                   | 0             | <b>c2*nernst1</b> |
| Concentration (c0)             | 0                   | <b>Corg</b>   | <b>c2*nernst</b>  |
| Integration order (wcporder)   | <b>4</b>            | <b>4</b>      | <b>4</b>          |
| Boundary                       | 10, 14              |               |                   |
| Type                           | Insulation/Symmetry |               |                   |
| Mass transfer coefficient (kc) | 0                   |               |                   |
| Bulk concentration (cb)        | 0                   |               |                   |
| Concentration (c0)             | 0                   |               |                   |
| Integration order (wcporder)   | <b>4</b>            |               |                   |

### 5.4.4. Subdomain Settings

|                             |                                     |  |
|-----------------------------|-------------------------------------|--|
| Subdomain                   | 1                                   |  |
| Shape functions (shape)     | <b>shlag(2,'lm1') shlag(2,'c1')</b> |  |
| Integration order (gporder) | <b>4</b>                            |  |
| Constraint order (cporder)  | <b>2</b>                            |  |
| Diffusion coefficient (D)   | <b>Dorg</b>                         |  |
| Subdomain initial value     | 1                                   |  |
| Concentration, c1 (c1)      | Corg                                |  |

## 6. Materials/Coefficients Library

### 6.1. Water

| Parameter                              | Value                |
|----------------------------------------|----------------------|
| Heat capacity at constant pressure (C) | Cp(T[1/K])[J/(kg*K)] |
| Speed of sound (cs)                    | cs(T[1/K])[m/s]      |
| Dynamic viscosity (eta)                | eta(T[1/K])[Pa*s]    |
| Ratio of specific heats (gamma)        | 1.0                  |

|                               |                       |
|-------------------------------|-----------------------|
| Thermal conductivity (k)      | $k(T[1/K])[W/(m^*K)]$ |
| Kinematic viscosity (nu0)     | $nu0(T[1/K])[m^2/s]$  |
| Density (rho)                 | $rho(T[1/K])[kg/m^3]$ |
| Electric conductivity (sigma) | 5.5e-6[S/m]           |

### 6.1.1. Piecewise Analytic Functions

#### 6.1.1.1. Function: rho(T)

Type: Polynomial

| X <sub>start</sub> | X <sub>end</sub> | f(x)                                                                 |
|--------------------|------------------|----------------------------------------------------------------------|
| 273.15             | 553.75           | 0 8.38466135E+02 1 1.40050603E+00 2 -3.01123760E-03 3 3.71822313E-07 |

#### 6.1.1.2. Function: Cp(T)

Type: Polynomial

| X <sub>start</sub> | X <sub>end</sub> | f(x)                                                                                   |
|--------------------|------------------|----------------------------------------------------------------------------------------|
| 273.15             | 553.75           | 0 1.20101471E+04 1 -8.04072879E+01 2 3.09866854E-01 3 -5.38186884E-04 4 3.62536437E-07 |

#### 6.1.1.3. Function: eta(T)

Type: Polynomial

| X <sub>start</sub> | X <sub>end</sub> | f(x)                                                                                                                                    |
|--------------------|------------------|-----------------------------------------------------------------------------------------------------------------------------------------|
| 273.15             | 413.15           | 0 1.3799566804E+00 1 -2.1224019151E-02 2 1.3604562827E-04 3 -4.6454090319E-07 4 8.9042735735E-10 5 -9.0790692686E-13 6 3.8457331488E-16 |
| 413.15             | 553.75           | 0 4.01235783E-03 1 -2.10746715E-05 2 3.85772275E-08 3 -2.39730284E-11                                                                   |

#### 6.1.1.4. Function: nu0(T)

Type: Polynomial

| X <sub>start</sub> | X <sub>end</sub> | f(x)                                                                                                                                    |
|--------------------|------------------|-----------------------------------------------------------------------------------------------------------------------------------------|
| 273.15             | 413.15           | 0 1.3903230155E-03 1 -2.1392545737E-05 2 1.3717187260E-07 3 -4.6851166702E-10 4 8.9823339887E-13 5 -9.1602964729E-16 6 3.8807189536E-19 |
| 413.15             | 553.75           | 0 1.36222834E-06 1 -4.45388688E-09 2 4.04364450E-12                                                                                     |

### 6.1.1.5. Function: k(T)

Type: Polynomial

| X <sub>start</sub> | X <sub>end</sub> | f(x)                                                                     |
|--------------------|------------------|--------------------------------------------------------------------------|
| 273.15             | 553.75           | 0 -8.69083936E-01 1 8.94880345E-03 2 -1.58366345E-05 3<br>7.97543259E-09 |

### 6.1.2. Interpolation Functions

#### 6.1.2.1. Interpolation Function: cs

Interpolation method: Piecewise Cubic

Data source type: Table

| x   | f(x) |
|-----|------|
| 273 | 1403 |
| 278 | 1427 |
| 283 | 1447 |
| 293 | 1481 |
| 303 | 1507 |
| 313 | 1526 |
| 323 | 1541 |
| 333 | 1552 |
| 343 | 1555 |
| 353 | 1555 |
| 363 | 1550 |
| 373 | 1543 |

## 7. Integration Coupling Variables

### 7.1. Geom1

#### 7.1.1. Source Boundary: 5

| Name          | Value                     |
|---------------|---------------------------|
| Variable name | lbar2                     |
| Expression    | ndflux_c2_di2*2*pi*r*n1*F |
| Order         | 4                         |
| Global        | Yes                       |

### 7.1.2. Source Boundary: 5

| Name          | Value                         |
|---------------|-------------------------------|
| Variable name | lbar1                         |
| Expression    | $-ndflux\_c1\_di*2*pi*r*n1*F$ |
| Order         | 4                             |
| Global        | Yes                           |

### 7.1.3. Source Boundary: 5

| Name          | Value                                                                 |
|---------------|-----------------------------------------------------------------------|
| Variable name | ct_flux                                                               |
| Expression    | $2*pi*r*F*(n1*ndflux\_c2\_di2-n2*ndflux\_c4\_di4+n3*ndflux\_c6\_di6)$ |
| Order         | 4                                                                     |
| Global        | Yes                                                                   |

## 8. Solver Settings

Solve using a script: off

|                          |                |
|--------------------------|----------------|
| Analysis type            | Transient      |
| Auto select solver       | On             |
| Solver                   | Time dependent |
| Solution form            | General        |
| Symmetric                | Off            |
| Adaptive mesh refinement | Off            |
| Optimization/Sensitivity | Off            |
| Plot while solving       | Off            |

### 8.1. Direct (UMFPACK)

Solver type: Linear system solver

| Parameter                | Value |
|--------------------------|-------|
| Pivot threshold          | 0.1   |
| Memory allocation factor | 0.7   |

### 8.2. Time Stepping

| Parameter | Value |
|-----------|-------|
|-----------|-------|

|                                          |                   |
|------------------------------------------|-------------------|
| Times                                    | range(0,0.1,70)   |
| Relative tolerance                       | 1e-4              |
| Absolute tolerance                       | 1e-4              |
| Times to store in output                 | Specified times   |
| Time steps taken by solver               | Free              |
| Maximum BDF order                        | 5                 |
| Singular mass matrix                     | Maybe             |
| Consistent initialization of DAE systems | Backward Euler    |
| Error estimation strategy                | Include algebraic |
| Allow complex numbers                    | Off               |

### 8.3. Advanced

| Parameter                                                              | Value       |
|------------------------------------------------------------------------|-------------|
| Constraint handling method                                             | Elimination |
| Null-space function                                                    | Automatic   |
| Automatic assembly block size                                          | On          |
| Assembly block size                                                    | 5000        |
| Use Hermitian transpose of constraint matrix and in symmetry detection | On          |
| Use complex functions with real input                                  | Off         |
| Stop if error due to undefined operation                               | On          |
| Store solution on file                                                 | Off         |
| Type of scaling                                                        | Automatic   |
| Manual scaling                                                         |             |
| Row equilibration                                                      | On          |
| Manual control of reassembly                                           | Off         |
| Load constant                                                          | On          |
| Constraint constant                                                    | On          |
| Mass constant                                                          | On          |
| Damping (mass) constant                                                | On          |
| Jacobian constant                                                      | On          |
| Constraint Jacobian constant                                           | On          |

### 9. Postprocessing

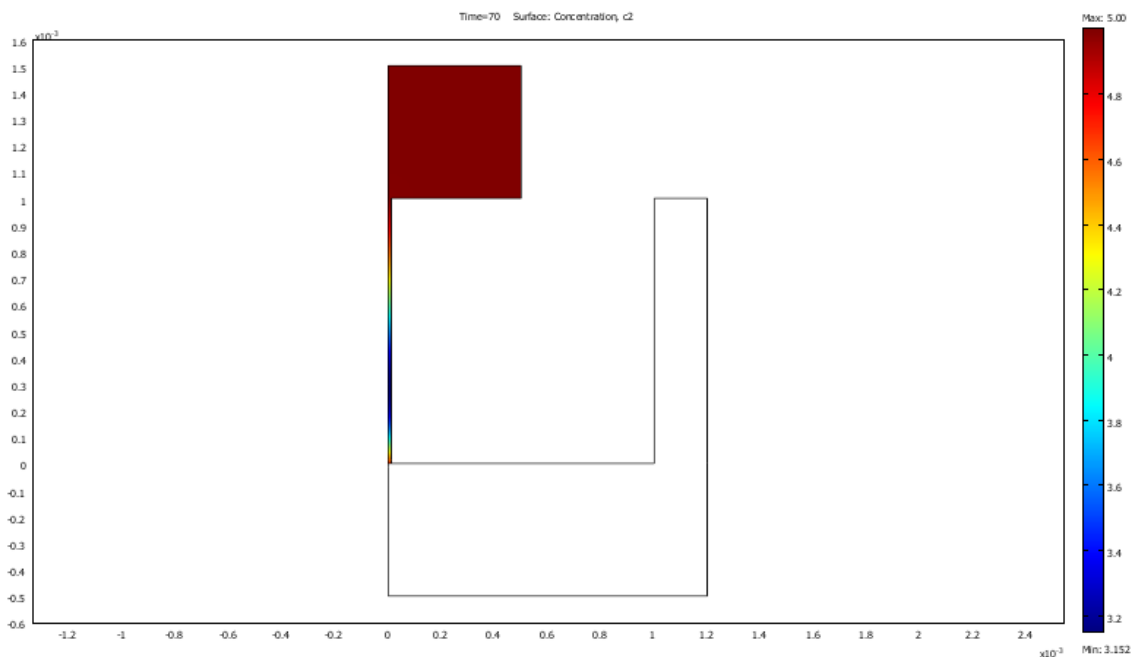

## 10. Variables

### 10.1. Boundary

#### 10.1.1. Boundary 1-3, 10, 14-17

| Name          | Description               | Expression                                              |
|---------------|---------------------------|---------------------------------------------------------|
| ndflux_c2_di2 | Normal diffusive flux, c2 |                                                         |
| ndflux_c1_di  | Normal diffusive flux, c1 | $nr\_di * dflux\_c1\_r\_di + nz\_di * dflux\_c1\_z\_di$ |

#### 10.1.2. Boundary 4, 6-9, 11-13

| Name          | Description               | Expression                                                  |
|---------------|---------------------------|-------------------------------------------------------------|
| ndflux_c2_di2 | Normal diffusive flux, c2 | $nr\_di2 * dflux\_c2\_r\_di2 + nz\_di2 * dflux\_c2\_z\_di2$ |
| ndflux_c1_di  | Normal diffusive flux, c1 |                                                             |

#### 10.1.3. Boundary 5

| Name          | Description               | Expression                                                  |
|---------------|---------------------------|-------------------------------------------------------------|
| ndflux_c2_di2 | Normal diffusive flux, c2 | $nr\_di2 * dflux\_c2\_r\_di2 + nz\_di2 * dflux\_c2\_z\_di2$ |
| ndflux_c1_di  | Normal diffusive flux, c1 | $nr\_di * dflux\_c1\_r\_di + nz\_di * dflux\_c1\_z\_di$     |

### 10.2. Subdomain

### 10.2.1. Subdomain 1

| Name           | Description                             | Expression                                                     |
|----------------|-----------------------------------------|----------------------------------------------------------------|
| grad_c2_r_di2  | Concentration gradient, c2, r component |                                                                |
| dflux_c2_r_di2 | Diffusive flux, c2, r component         |                                                                |
| grad_c2_z_di2  | Concentration gradient, c2, z component |                                                                |
| dflux_c2_z_di2 | Diffusive flux, c2, z component         |                                                                |
| grad_c2_di2    | Concentration gradient, c2              |                                                                |
| dflux_c2_di2   | Diffusive flux, c2                      |                                                                |
| grad_c1_r_di   | Concentration gradient, c1, r component | c1r                                                            |
| dflux_c1_r_di  | Diffusive flux, c1, r component         | -Drr_c1_di * c1r-Drz_c1_di * c1z                               |
| grad_c1_z_di   | Concentration gradient, c1, z component | c1z                                                            |
| dflux_c1_z_di  | Diffusive flux, c1, z component         | -Dzr_c1_di * c1r-Dzz_c1_di * c1z                               |
| grad_c1_di     | Concentration gradient, c1              | $\sqrt{\text{grad\_c1\_r\_di}^2 + \text{grad\_c1\_z\_di}^2}$   |
| dflux_c1_di    | Diffusive flux, c1                      | $\sqrt{\text{dflux\_c1\_r\_di}^2 + \text{dflux\_c1\_z\_di}^2}$ |

### 10.2.2. Subdomain 2

| Name           | Description                             | Expression                                                       |
|----------------|-----------------------------------------|------------------------------------------------------------------|
| grad_c2_r_di2  | Concentration gradient, c2, r component | c2r                                                              |
| dflux_c2_r_di2 | Diffusive flux, c2, r component         | -Drr_c2_di2 * c2r-Drz_c2_di2 * c2z                               |
| grad_c2_z_di2  | Concentration gradient, c2, z component | c2z                                                              |
| dflux_c2_z_di2 | Diffusive flux, c2, z component         | -Dzr_c2_di2 * c2r-Dzz_c2_di2 * c2z                               |
| grad_c2_di2    | Concentration gradient, c2              | $\sqrt{\text{grad\_c2\_r\_di2}^2 + \text{grad\_c2\_z\_di2}^2}$   |
| dflux_c2_di2   | Diffusive flux, c2                      | $\sqrt{\text{dflux\_c2\_r\_di2}^2 + \text{dflux\_c2\_z\_di2}^2}$ |
| grad_c1_r_di   | Concentration gradient, c1, r component |                                                                  |
| dflux_c1_r_di  | Diffusive flux, c1, r component         |                                                                  |
| grad_c1_z_di   | Concentration gradient, c1, z component |                                                                  |
| dflux_c1_z_di  | Diffusive flux, c1, z component         |                                                                  |
| grad_c1_di     | Concentration gradient, c1              |                                                                  |
| dflux_c1_di    | Diffusive flux, c1                      |                                                                  |
